# Supplementary material for: Rapid Microwave-Assisted Synthesis of N/TiO2/rGO Nanoparticles for the Photocatalytic Degradation of Pharmaceuticals
Source: MDPI journal article supplement (doi:10.3390/nano12223975), 2022-11-11
Supplement: s1 [file s1]

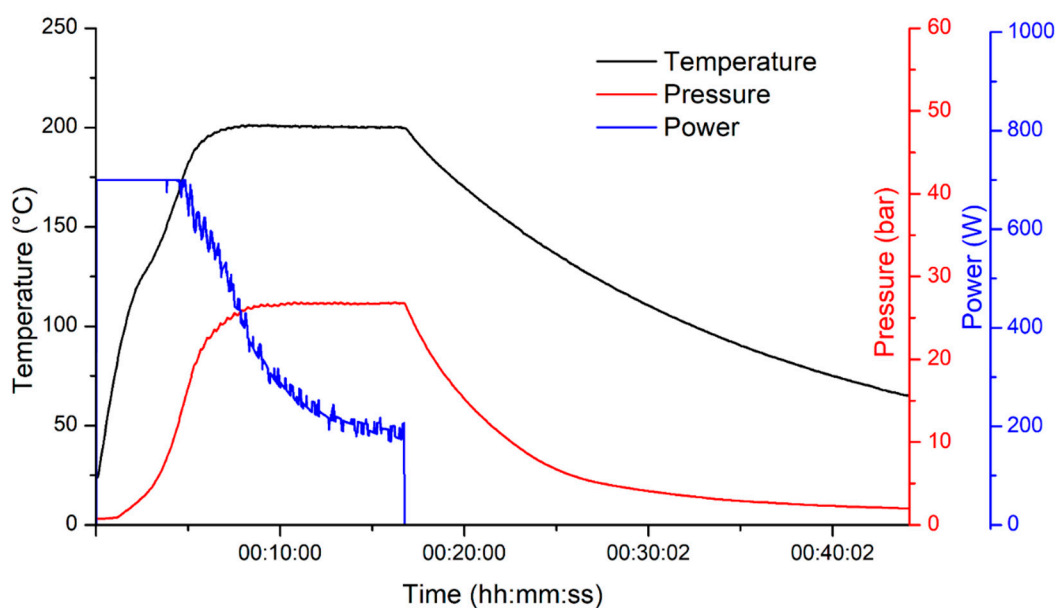

**Figure S1.** Inner pressure, temperature, and power supplied by the Microwave oven during the synthesis of nanocomposite N/TiO<sub>2</sub>/rGO with 0.25 wt. % of rGO.

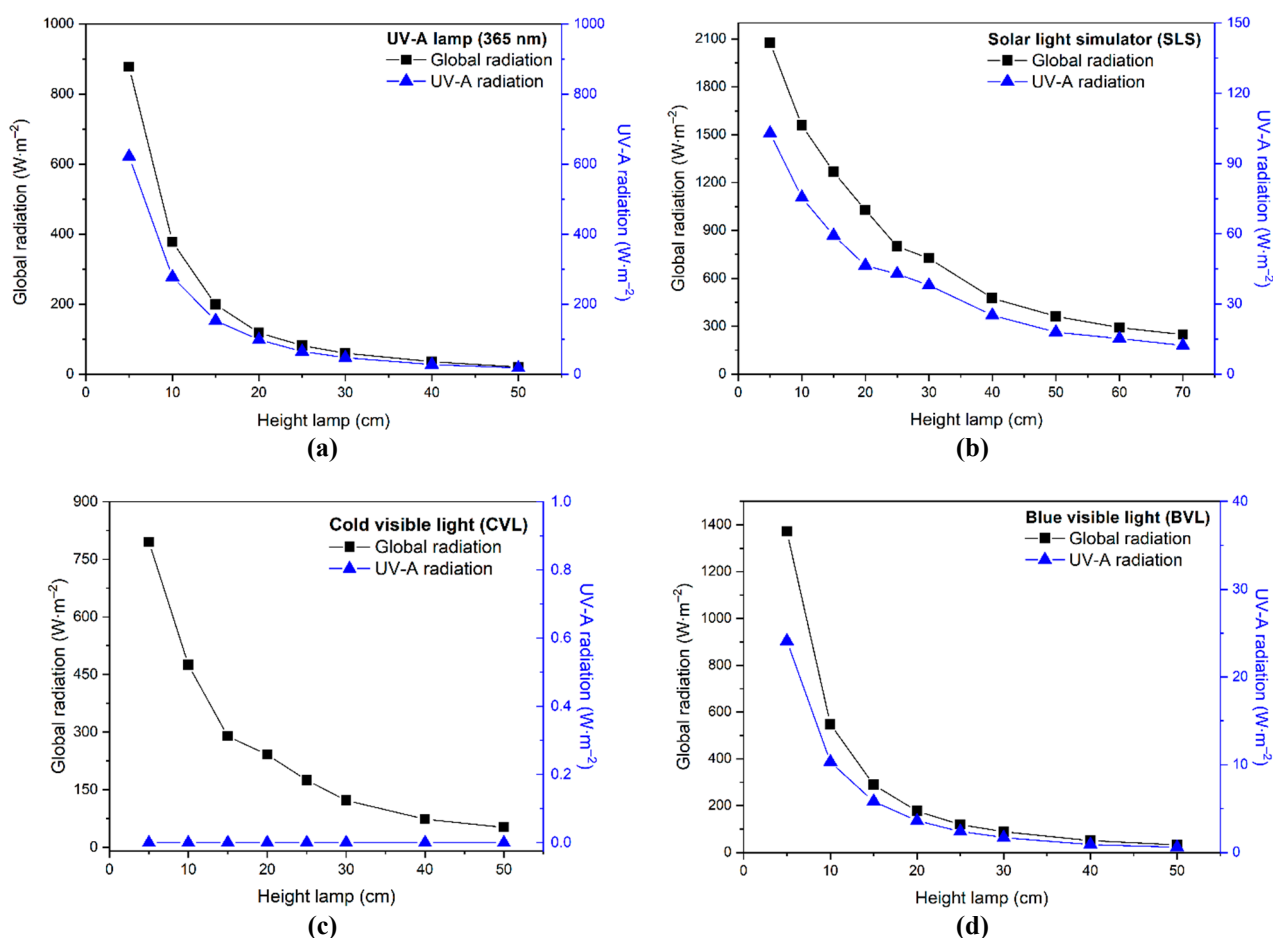

**Figure S2.** Global and UV-A radiation measurement of (a) UV-A lamp, (b) solar light simulator (SLS) lamp, (c) cold visible light (CVL) lamp, and (d) blue visible light (BVL) lamp.

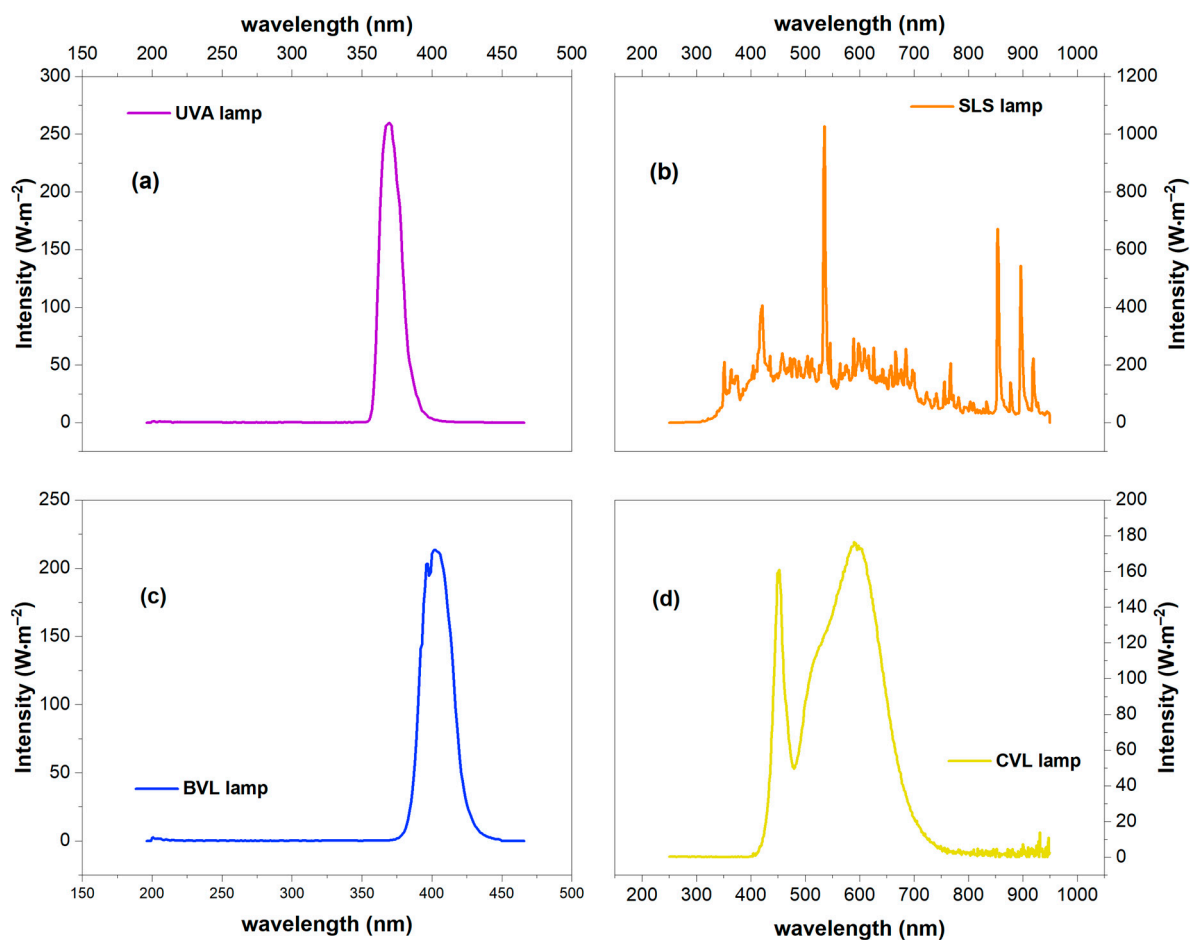

**Figure S3.** Radiation spectra of the different lamps at 20 cm height: (a) UVA light (UVA), (b) Solar light simulator (SLS), (c) Blue visible light (BVL), and (d) Cold visible light (CVL).

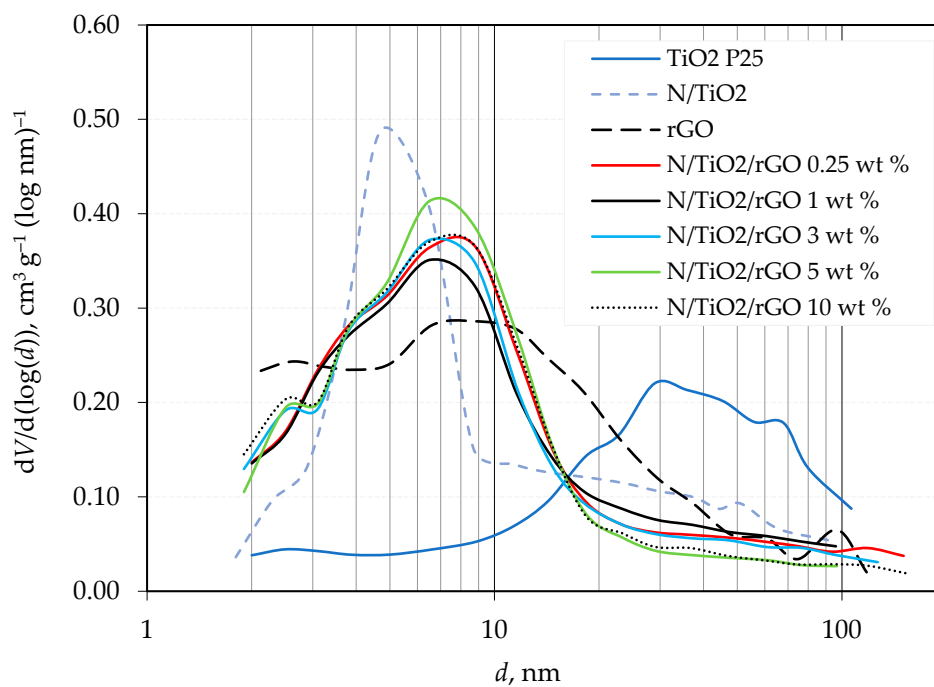

**Figure S4.** Pore size distribution of N/TiO<sub>2</sub>, N/TiO<sub>2</sub>/rGO with different amounts of rGO (0.25, 1, 3, 5, and 10 wt. %), and P25 photocatalysts.

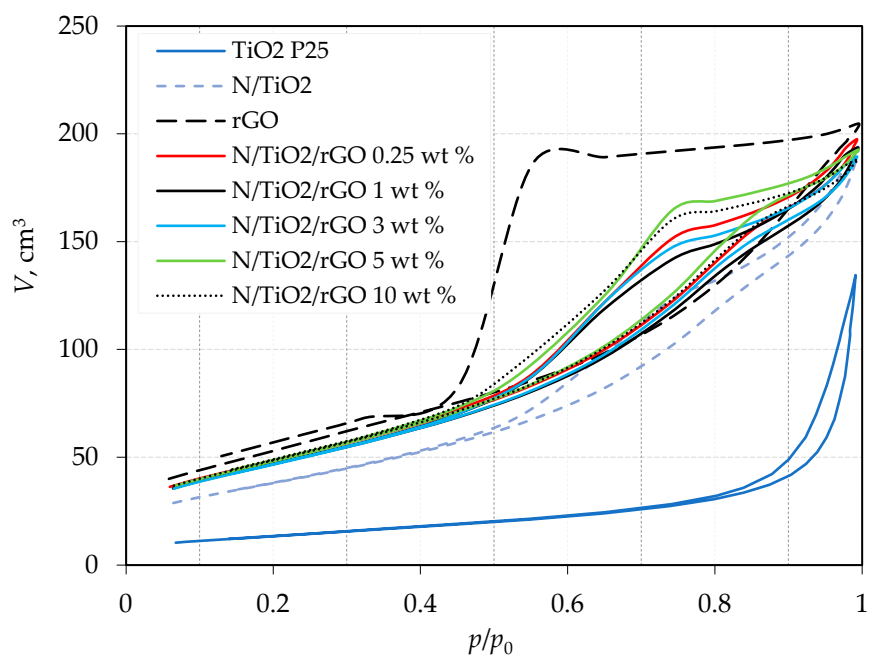

**Figure S5.** Nitrogen adsorption-desorption isotherms of N/TiO<sub>2</sub>, N/TiO<sub>2</sub>/rGO with different amounts of rGO (0.25, 1, 3, 5, and 10 wt. %), and P25 photocatalysts.

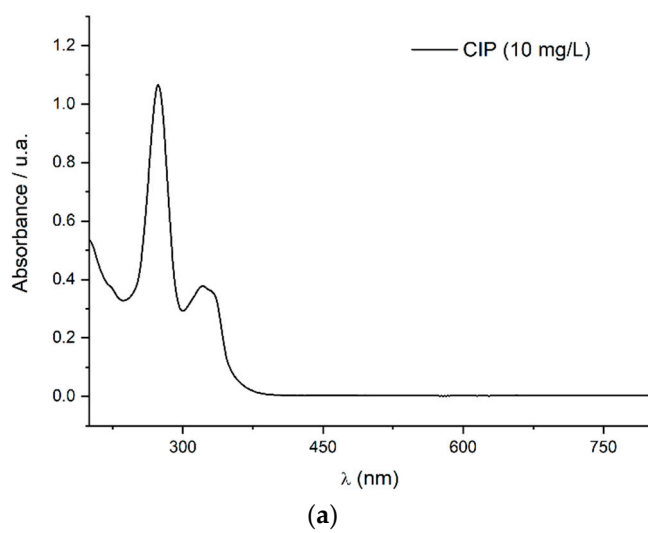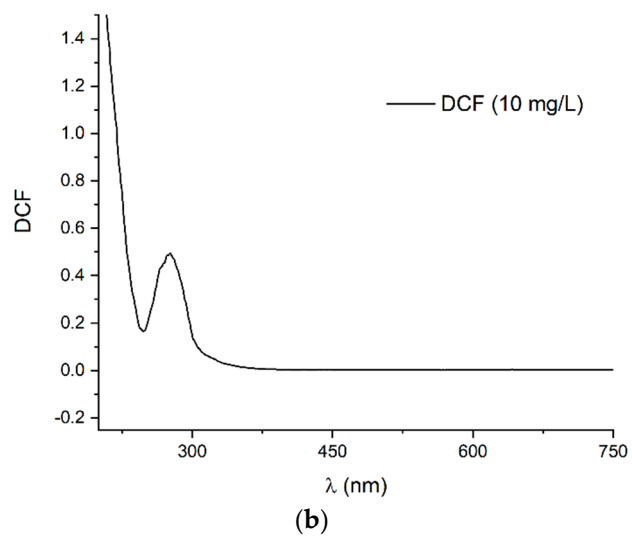

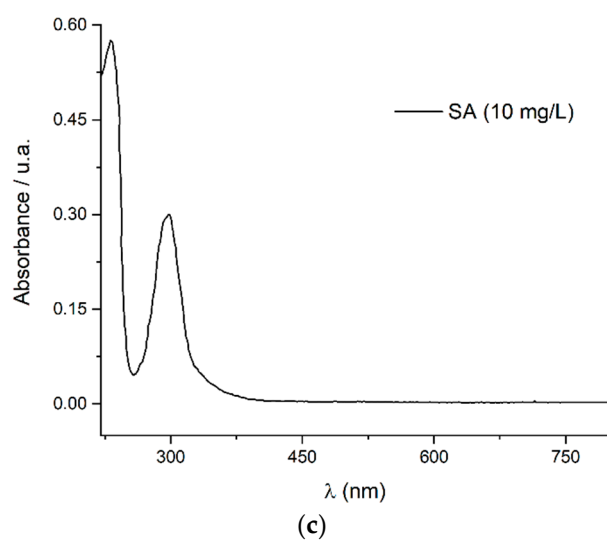

**Figure S6.** UV/Vis absorbance spectra of the initial concentration of (a) ciprofloxacin (CIP), (b) diclofenac (DCF), and (c) salicylic acid (SA).
